# Supplementary material for: Integrated microbiome–metabolome analysis reveals novel associations between fecal microbiota and hyperglycemia-related changes of plasma metabolome in gestational diabetes mellitus
Source: Royal Society of Chemistry journal article supplement (doi:10.1039/c9ra07799e), 2020-01-01
Supplement: c9ra07799e1.pdf [file c9ra07799e1.pdf]

Figure S1. Loading scatter plot from the OPLS-DA model.

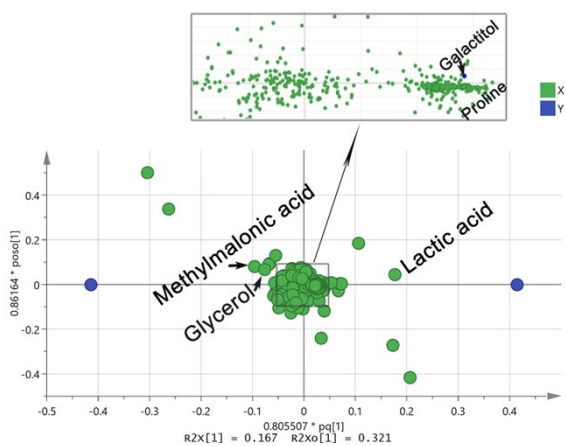

**Table S1. Envfit test of the RDA on differential metabolites against fecal microbiota**

| <b>Metabolite</b>  | <b>RDA1</b> | <b>RDA2</b> | <b>r2</b> | <b>P-Value</b> |
|--------------------|-------------|-------------|-----------|----------------|
| Glycerol           | 0.08882     | -0.99605    | 0.1657    | 0.038*         |
| Galactitol         | -0.98913    | 0.14705     | 0.1075    | 0.133          |
| Lactic_acid        | -0.00380    | 0.99999     | 0.3255    | 0.003**        |
| Methylmalonic acid | 0.25389     | -0.96723    | 0.1583    | 0.05*          |
| Proline            | -0.32288    | 0.94644     | 0.1847    | 0.031*         |

RDA1 and RDA2 represent the cosine value of angle with the two ordination axes in Figure 3C

r2 represents the coefficient of determination on the metabolite against the microbiota, the bigger the value, the higher the effect of the metabolite.

P-Value represents results of significant test of the correlation, '\*\*' 0.01, '\*' 0.05, ' ' 1

**Table S2. Spearman rank correlation of differential plasma metabolites with clinical indices of GDM.**

|                         | FG       | DeltaBMI | Diastolic pressure | Systolic pressure | Fundal height | Abdominal circumference | Galactitol | Lactic acid | Methylmalonic acid | Proline |
|-------------------------|----------|----------|--------------------|-------------------|---------------|-------------------------|------------|-------------|--------------------|---------|
| FG                      |          | -0.27    | -0.40              | -0.52             | -0.19         | -0.62                   | -0.75      | 0.83        | -0.77              | 0.76    |
| DeltaBMI                | 4.44E-01 |          | 0.74               | 0.89              | 0.49          | 0.59                    | -0.16      | -0.38       | -0.08              | -0.09   |
| Diastolic Pressure      | 2.53E-01 | 1.42E-02 |                    | 0.82              | 0.55          | 0.54                    | -0.10      | -0.56       | 0.08               | -0.15   |
| Systolic pressure       | 1.23E-01 | 5.85E-04 | 3.49E-03           |                   | 0.39          | 0.70                    | 0.01       | -0.57       | 0.13               | -0.26   |
| Fundal height           | 6.05E-01 | 1.48E-01 | 1.02E-01           | 2.61E-01          |               | 0.64                    | -0.16      | -0.44       | -0.11              | 0.11    |
| Abdominal circumference | 5.81E-02 | 6.97E-02 | 1.09E-01           | 2.46E-02          | 4.54E-02      |                         | 0.13       | -0.67       | 0.18               | -0.21   |
| Galactitol              | 1.17E-02 | 6.52E-01 | 7.86E-01           | 9.71E-01          | 6.60E-01      | 7.25E-01                |            | -0.57       | 0.91               | -0.91   |
| Lactic acid             | 3.08E-03 | 2.82E-01 | 8.97E-02           | 8.33E-02          | 1.99E-01      | 3.30E-02                | 8.59E-02   |             | -0.70              | 0.67    |
| Methylmalonic acid      | 9.44E-03 | 8.30E-01 | 8.35E-01           | 7.29E-01          | 7.59E-01      | 6.13E-01                | 2.45E-04   | 2.43E-02    |                    | -0.96   |
| Proline                 | 1.03E-02 | 8.11E-01 | 6.74E-01           | 4.69E-01          | 7.55E-01      | 5.59E-01                | 2.57E-04   | 3.59E-02    | 6.62E-06           |         |

FG: Fasting glucose; DeltaBMI: The difference between BMI at sampling and BMI before pregnancy.

The upper right panel exhibits the rho values of the correlation matrix. Positive value indicates positive correlation, negative value indicates negative correlation.

The bottom left panel exhibits the *P* values of the correlation matrix.

**Table S3. Envfit test of RDA on OTUs of fecal microbiota against plasma metabolome**

| <b>OTU</b> | <b>RDA1</b> | <b>RDA2</b> | <b>r2</b> | <b>Pr(&gt;r)</b> |
|------------|-------------|-------------|-----------|------------------|
| OTU000137  | 0.81679     | -0.57694    | 0.2309    | 0.001            |
| OTU000726  | 0.87569     | -0.48287    | 0.3415    | 0.001            |
| OTU000705  | 0.76584     | -0.64303    | 0.3161    | 0.001            |
| OTU000967  | 0.82092     | -0.57105    | 0.2212    | 0.001            |
| OTU000536  | -0.87623    | -0.48189    | 0.2376    | 0.001            |
| OTU000566  | 0.83419     | -0.55148    | 0.1999    | 0.003            |
| OTU000068  | -0.7577     | -0.6526     | 0.2986    | 0.004            |
| OTU000305  | 0.91265     | -0.40874    | 0.2243    | 0.004            |
| OTU000340  | 0.82099     | -0.57095    | 0.2807    | 0.004            |
| OTU000507  | 0.82726     | -0.56181    | 0.1651    | 0.005            |
| OTU000525  | 0.81853     | -0.57446    | 0.1793    | 0.005            |
| OTU000691  | -0.88234    | -0.47061    | 0.1957    | 0.005            |
| OTU000221  | -0.936      | -0.35199    | 0.2439    | 0.007            |
| OTU000453  | 0.83492     | -0.55037    | 0.1638    | 0.007            |
| OTU000579  | -0.80619    | -0.59166    | 0.2109    | 0.007            |
| OTU000648  | 0.8355      | -0.54949    | 0.1671    | 0.007            |
| OTU000773  | 0.67404     | -0.73869    | 0.2263    | 0.007            |
| OTU000819  | 0.83577     | -0.54908    | 0.1685    | 0.007            |
| OTU000805  | 0.83587     | -0.54893    | 0.169     | 0.007            |
| OTU000581  | 0.89583     | -0.4444     | 0.2779    | 0.007            |
| OTU000111  | -0.9002     | -0.43547    | 0.22      | 0.008            |
| OTU000816  | 0.83613     | -0.54853    | 0.1705    | 0.008            |
| OTU000814  | -0.84494    | -0.53486    | 0.1629    | 0.009            |
| OTU000480  | 0.70087     | -0.71329    | 0.2067    | 0.01             |
| OTU000894  | 0.83655     | -0.54789    | 0.1727    | 0.01             |
| OTU000501  | 0.9652      | -0.26152    | 0.1818    | 0.011            |
| OTU000468  | 0.79325     | -0.60889    | 0.1734    | 0.011            |
| OTU000141  | -0.92837    | -0.37165    | 0.1743    | 0.013            |
| OTU000455  | 0.73955     | -0.6731     | 0.2192    | 0.013            |
| OTU000590  | -0.84267    | -0.53844    | 0.161     | 0.013            |
| OTU000512  | 0.83314     | -0.55307    | 0.1621    | 0.013            |
| OTU000509  | 0.69416     | -0.71983    | 0.1966    | 0.013            |
| OTU000504  | -0.82931    | -0.55879    | 0.1618    | 0.013            |
| OTU000689  | 0.08754     | -0.99616    | 0.1957    | 0.013            |
| OTU000583  | 0.84313     | -0.53771    | 0.1621    | 0.013            |
| OTU000883  | -0.90432    | -0.42686    | 0.2009    | 0.014            |
| OTU001060  | 0.92497     | -0.38004    | 0.1789    | 0.014            |
| OTU000508  | -0.84216    | -0.53923    | 0.1649    | 0.015            |
| OTU000461  | 0.8326      | -0.55388    | 0.1621    | 0.016            |
| OTU000616  | 0.7544      | -0.65642    | 0.1883    | 0.016            |
| OTU000847  | -0.81075    | -0.58539    | 0.1755    | 0.019            |
| OTU000778  | -0.81637    | -0.57752    | 0.1631    | 0.021            |

**Table S3 Continued 1.**

| <b>OTU</b> | <b>RDA1</b> | <b>RDA2</b> | <b>r2</b> | <b>Pr(&gt;r)</b> |
|------------|-------------|-------------|-----------|------------------|
| OTU000844  | 0.84407     | -0.53624    | 0.1608    | 0.021            |
| OTU000607  | 0.83471     | -0.55069    | 0.1627    | 0.022            |
| OTU000567  | 0.83471     | -0.55069    | 0.1627    | 0.022            |
| OTU000606  | 0.83471     | -0.55069    | 0.1627    | 0.022            |
| OTU000808  | -0.8024     | -0.59679    | 0.1641    | 0.022            |
| OTU000845  | 0.83471     | -0.55069    | 0.1627    | 0.022            |
| OTU000890  | 0.83471     | -0.55069    | 0.1627    | 0.022            |
| OTU001008  | 0.83471     | -0.55069    | 0.1627    | 0.022            |
| OTU000908  | 0.83471     | -0.55069    | 0.1627    | 0.022            |
| OTU000039  | -0.78634    | -0.61779    | 0.1956    | 0.024            |
| OTU000165  | 0.99957     | 0.02945     | 0.1678    | 0.026            |
| OTU000522  | -0.88414    | -0.46722    | 0.1695    | 0.026            |
| OTU000925  | -0.68       | -0.73321    | 0.182     | 0.026            |
| OTU000554  | -0.99228    | -0.12402    | 0.178     | 0.026            |
| OTU000114  | 0.72538     | -0.68835    | 0.164     | 0.027            |
| OTU000102  | 0.00874     | 0.99996     | 0.1742    | 0.027            |
| OTU000390  | 0.81648     | -0.57738    | 0.1545    | 0.027            |
| OTU000352  | 0.81779     | -0.57552    | 0.1746    | 0.027            |
| OTU000355  | 0.8682      | -0.49622    | 0.1523    | 0.027            |
| OTU000812  | -0.64725    | -0.76228    | 0.1655    | 0.027            |
| OTU000927  | 0.82676     | -0.56255    | 0.1564    | 0.027            |
| OTU000341  | 0.87764     | -0.47933    | 0.1501    | 0.028            |
| OTU000147  | 0.87995     | -0.47508    | 0.1502    | 0.029            |
| OTU000285  | -0.98621    | -0.16548    | 0.1703    | 0.029            |
| OTU000483  | 0.89235     | -0.45135    | 0.1573    | 0.029            |
| OTU000268  | 0.69001     | -0.7238     | 0.1684    | 0.031            |
| OTU000370  | 0.96696     | -0.25493    | 0.1579    | 0.031            |
| OTU000620  | -0.83251    | -0.55402    | 0.1595    | 0.031            |
| OTU000241  | 0.85556     | -0.51771    | 0.1623    | 0.032            |
| OTU000609  | -0.59581    | -0.80312    | 0.1691    | 0.032            |
| OTU000129  | -0.3025     | -0.95315    | 0.1859    | 0.033            |
| OTU000313  | 0.84888     | -0.52859    | 0.1533    | 0.033            |
| OTU000673  | 0.8502      | -0.52646    | 0.1529    | 0.033            |
| OTU000739  | 0.92443     | -0.38134    | 0.1621    | 0.033            |
| OTU000467  | 0.89613     | -0.44379    | 0.175     | 0.034            |
| OTU000301  | 0.87514     | -0.48387    | 0.162     | 0.035            |
| OTU000988  | -0.83513    | -0.55006    | 0.1576    | 0.035            |
| OTU000336  | 0.40281     | -0.91529    | 0.1653    | 0.037            |
| OTU000353  | 0.44899     | -0.89354    | 0.1734    | 0.037            |
| OTU000976  | -0.57407    | -0.81881    | 0.1652    | 0.038            |
| OTU000071  | 0.29018     | -0.95697    | 0.1562    | 0.039            |
| OTU000496  | 0.85523     | -0.51826    | 0.1515    | 0.039            |

**Table S3 Continued 2.**

| <b>OTU</b> | <b>RDA1</b> | <b>RDA2</b> | <b>r2</b> | <b>Pr(&gt;r)</b> |
|------------|-------------|-------------|-----------|------------------|
| OTU000105  | 0.96603     | -0.25841    | 0.1651    | 0.041            |
| OTU000349  | 0.71864     | -0.69538    | 0.1469    | 0.041            |
| OTU000277  | 0.91722     | -0.39838    | 0.1645    | 0.042            |
| OTU000255  | 0.78456     | -0.62005    | 0.1691    | 0.043            |
| OTU000292  | 0.8692      | -0.49446    | 0.1471    | 0.043            |
| OTU000793  | -0.83562    | -0.54931    | 0.1537    | 0.044            |
| OTU000521  | 0.53186     | -0.84683    | 0.1596    | 0.045            |
| OTU000568  | 0.85256     | -0.52262    | 0.1421    | 0.048            |
| OTU000332  | 0.85105     | -0.52509    | 0.1515    | 0.049            |
| OTU000547  | 0.85783     | -0.51394    | 0.1542    | 0.049            |
| OTU000760  | -0.84072    | -0.54146    | 0.1541    | 0.05             |
| OTU000709  | 0.49485     | -0.86898    | 0.1516    | 0.05             |

RDA1 and RDA2 represent the cosine value of angle with the two ordination axes in Figure 3C  
r2 represents the coefficient of determination on the metabolite against the microbiota,  
the bigger the value, the higher effect of the metabolite.

Pr represents significant test of the correlation, '\*\*' 0.01, '\*' 0.05, ' ' 1

**Table S4. Spearman rank correlation on fecal microbiota members that contributed to the separation of the plasma metabolome of GDM.**

|           | OTU<br>000607 | OTU<br>000567 | OTU<br>000805 | OTU<br>000819 | OTU<br>000453 | OTU<br>000461 | OTU<br>000606 | OTU<br>000583 | OTU<br>000648 | OTU<br>000816 | OTU<br>000894 | OTU<br>000845 | OTU<br>000890 | OTU<br>001008 | OTU<br>000908 |      |
|-----------|---------------|---------------|---------------|---------------|---------------|---------------|---------------|---------------|---------------|---------------|---------------|---------------|---------------|---------------|---------------|------|
| OTU000607 |               | 1.00          | 0.72          | 0.72          | 0.72          | 0.59          | 1.00          | 0.59          | 0.72          | 0.72          | 0.72          | 0.72          | 1.00          | 1.00          | 1.00          |      |
| OTU000567 | 2.58E-293     |               | 0.72          | 0.72          | 0.72          | 0.59          | 1.00          | 0.59          | 0.72          | 0.72          | 0.72          | 0.72          | 1.00          | 1.00          | 1.00          |      |
| OTU000805 | 2.04E-07      | 2.04E-07      |               | 1.00          | 1.00          | 0.82          | 0.72          | 0.82          | 1.00          | 1.00          | 1.00          | 0.50          | 0.72          | 0.72          | 0.72          |      |
| OTU000819 | 2.04E-07      | 2.04E-07      | 2.58E-293     |               | 1.00          | 0.82          | 0.72          | 0.82          | 1.00          | 1.00          | 1.00          | 0.50          | 0.72          | 0.72          | 0.72          |      |
| OTU000453 | 2.04E-07      | 2.04E-07      | 2.58E-293     | 2.58E-293     |               | 0.82          | 0.72          | 0.82          | 1.00          | 1.00          | 1.00          | 0.50          | 0.72          | 0.72          | 0.72          |      |
| OTU000461 | 5.66E-05      | 5.66E-05      | 1.33E-10      | 1.33E-10      | 1.33E-10      |               | 0.59          | 0.66          | 0.82          | 0.82          | 0.82          | 0.40          | 0.59          | 0.59          | 0.59          |      |
| OTU000606 | 2.58E-293     | 2.58E-293     | 2.04E-07      | 2.04E-07      | 2.04E-07      | 5.66E-05      |               | 0.59          | 0.72          | 0.72          | 0.72          | 0.72          | 1.00          | 1.00          | 1.00          |      |
| OTU000583 | 5.66E-05      | 5.66E-05      | 1.33E-10      | 1.33E-10      | 1.33E-10      | 3.97E-06      | 5.66E-05      |               | 0.82          | 0.82          | 0.82          | 0.40          | 0.59          | 0.59          | 0.59          |      |
| OTU000648 | 2.04E-07      | 2.04E-07      | 2.58E-293     | 2.58E-293     | 2.58E-293     | 1.33E-10      | 2.04E-07      | 1.33E-10      |               | 1.00          | 1.00          | 0.50          | 0.72          | 0.72          | 0.72          |      |
| OTU000816 | 2.04E-07      | 2.04E-07      | 2.58E-293     | 2.58E-293     | 2.58E-293     | 1.33E-10      | 2.04E-07      | 1.33E-10      | 2.58E-293     |               | 1.00          | 0.50          | 0.72          | 0.72          | 0.72          |      |
| OTU000894 | 2.04E-07      | 2.04E-07      | 2.58E-293     | 2.58E-293     | 2.58E-293     | 1.33E-10      | 2.04E-07      | 1.33E-10      | 2.58E-293     | 2.58E-293     |               | 0.50          | 0.72          | 0.72          | 0.72          |      |
| OTU000845 | 2.04E-07      | 2.04E-07      | 1.02E-03      | 1.02E-03      | 1.02E-03      | 9.93E-03      | 2.04E-07      | 9.93E-03      | 1.02E-03      | 1.02E-03      | 1.02E-03      |               | 0.72          | 0.72          | 0.72          |      |
| OTU000890 | 2.58E-293     | 2.58E-293     | 2.04E-07      | 2.04E-07      | 2.04E-07      | 5.66E-05      | 2.58E-293     | 5.66E-05      | 2.04E-07      | 2.04E-07      | 2.04E-07      | 2.04E-07      |               | 1.00          | 1.00          |      |
| OTU001008 | 2.58E-293     | 2.58E-293     | 2.04E-07      | 2.04E-07      | 2.04E-07      | 5.66E-05      | 2.58E-293     | 5.66E-05      | 2.04E-07      | 2.04E-07      | 2.04E-07      | 2.04E-07      | 2.04E-07      | 2.58E-293     |               | 1.00 |
| OTU000908 | 2.58E-293     | 2.58E-293     | 2.04E-07      | 2.04E-07      | 2.04E-07      | 5.66E-05      | 2.58E-293     | 5.66E-05      | 2.04E-07      | 2.04E-07      | 2.04E-07      | 2.04E-07      | 2.04E-07      | 2.58E-293     | 2.58E-293     |      |

OTU: Operational Taxonomy Unit

The upper right panel exhibits the rho values of the correlation matrix. Positive value indicates positive correlation, negative value indicates negative correlation.

The bottom left panel exhibits the *P* values of the correlation matrix.
